# Supplementary material for: IL-6/IL-12 Cytokine Receptor Shuffling of Extra- and Intracellular Domains Reveals Canonical STAT Activation via Synthetic IL-35 and IL-39 Signaling
Source: PubMed Central journal article supplement (PMC5680241; doi:10.1038/s41598-017-15173-3), 2017-11-09

**IL-6/IL-12 CYTOKINE RECEPTOR SHUFFLING OF EXTRA- AND INTRACELLULAR  
DOMAINS REVEALS CANONICAL STAT ACTIVATION VIA SYNTHETIC IL-35 AND IL-39  
SIGNALING**

**D.M. Floss, M. Schönberg, M. Franke, F.C. Horstmeier, E. Engelowski, A. Schneider, E.M.  
Rosenfeldt & J. Scheller**

Institute of Biochemistry and Molecular Biology II, Medical Faculty, Heinrich-Heine-University, 40225  
Düsseldorf, Germany. <sup>§</sup>Correspondence should be addressed to JS (email: [jscheller@uni-duesseldorf.de](mailto:jscheller@uni-duesseldorf.de))  
and DMF ([Doreen.Floss@uni-duesseldorf.de](mailto:Doreen.Floss@uni-duesseldorf.de))

## Supplemental Figure Legends

Figure S1. Cellular proliferation of Ba/F3-gp130 and Ba/F3-gp130/IL-12R $\beta$ 2 cells. Parental Ba/F3 cells expressing WSX-1 have been genetically modified with cDNAs for human gp130 and murine IL-12R $\beta$ 1. Equal numbers of cells were cultured for 3 days in the presence of HIL-6, recombinant murine IL-27 and recombinant human IL-35-Fc as indicated. Proliferation was measured using the colorimetric CellTiter-Blue Cell Viability Assay. HIL-6-induced proliferation was set to 100%. One representative experiment out of two is shown. Error bars represent SD. Statistical analysis used a Welch t test ( $n = 3$ ; \* $p \leq 0.05$ ; \*\* $p \leq 0.01$ ; \*\*\* $p \leq 0.001$ ).

**SFigure 2.** (A) Representative histograms of all (chimeric) receptor cell surface expression in single transduced Ba/F3-gp130 cell lines (light solid lines) tested in this study. Gray-shaded areas indicate Ba/F3-gp130 cells (negative control). (B) Western blotting of all (chimeric) receptors in transiently transfected COS-7 cells. pEGFP-transduced cells served as negative control. The blot has been assembled from three independent Western blots.

**SFigure 3.** Analysis of IL-12 and IL-23 induced signal transduction. (A) Analysis of STAT1/3 and Erk1/2 activation. Ba/F3-gp130/IL-12R $\beta$ 1, Ba/F3-gp130/IL-12R $\beta$ 2 and Ba/F3-gp130/IL-12R $\beta$ 1/IL-12R $\beta$ 2 cells were washed three times, starved, and stimulated with 10 ng/ml HIL-6 or 4 ng/ml HIL-12 for 30 min. Cellular lysates were prepared, and equal amounts of total protein (50  $\mu$ g/lane) were loaded on SDS gels, followed by immunoblotting using specific antibodies for phospho-STAT1/3/Erk1/2 and STAT1/3/Erk1/2. Western blot data show one representative experiment out of three. (B) Cellular proliferation of Ba/F3-gp130/IL-12R $\beta$ 1, Ba/F3-gp130/IL-12R $\beta$ 2 and Ba/F3-gp130/IL-12R $\beta$ 1/IL-12R $\beta$ 2 cells. Equal numbers of cells were cultured for 3 days in the presence of 4 ng/ml HIL-12. Proliferation was measured using the colorimetric CellTiter-Blue Cell Viability Assay. HIL-6-induced proliferation (10 ng/ml) was set to 100%. One representative experiment out of three is shown. Error bars represent SD. Statistical analysis used a Welch t test ( $n = 3$ ; \* $p \leq 0.05$ ; \*\* $p \leq 0.01$ ; \*\*\* $p \leq 0.001$ ). (C) Analysis of STAT1/3 and Erk1/2 activation. Ba/F3-gp130/IL-12R $\beta$ 1, Ba/F3-gp130/IL-23R and Ba/F3-gp130/IL-12R $\beta$ 1/IL-23R cells were washed three times, starved, and stimulated with 10 ng/ml HIL-23 for 30 min. Cellular lysates were prepared, and equal amounts of total protein (50  $\mu$ g/lane) were loaded on SDS gels, followed by immunoblotting using specific antibodies for phospho-STAT1/3/Erk1/2 and STAT1/3/Erk1/2. Western blot data show one representative experiment out of three. (D) Cellular proliferation of Ba/F3-gp130/IL-12R $\beta$ 1, Ba/F3-gp130/IL-23R and Ba/F3-gp130/IL-12R $\beta$ 1/IL-23R. Equal numbers of cells were cultured for 3 days in the presence of 10 ng/ml HIL-23. Proliferation was measured using the colorimetric CellTiter-Blue Cell Viability Assay. HIL-6-induced proliferation (10 ng/ml) was set to 100%. One representative experiment out of three is shown. Error bars represent SD. Statistical analysis used a Welch t test ( $n = 3$ ; ns = not significant; \*\*\* $p \leq 0.001$ ). (E) Analysis of STAT3 target gene expression of Pim-1 in Ba/F3-gp130 cells stably transduced with IL-12R $\beta$ 1 and IL-12R $\beta$ 2 stimulated with 4 ng/ml IL-12 for 2 h. One representative experiment out of two is shown. (F) Western blotting of secreted HIL-23 and HIL-12 from CHO-K1 cells.

Figure S1

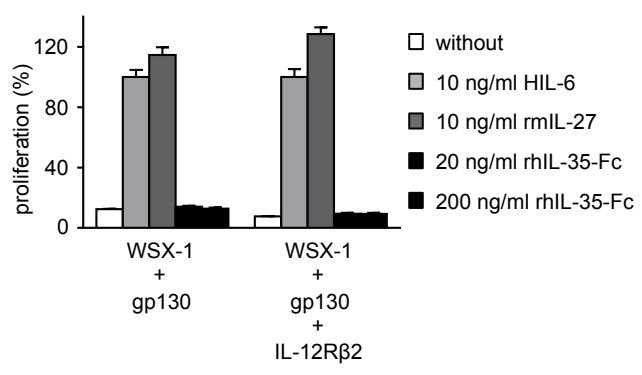

Figure S2

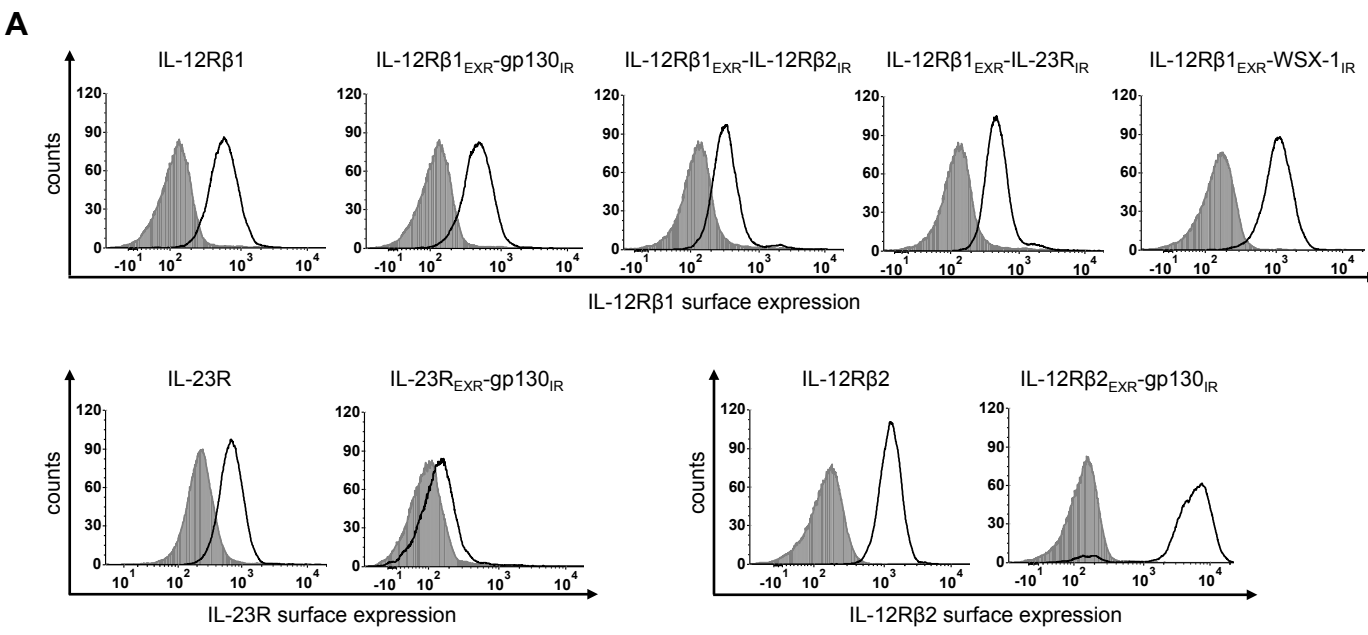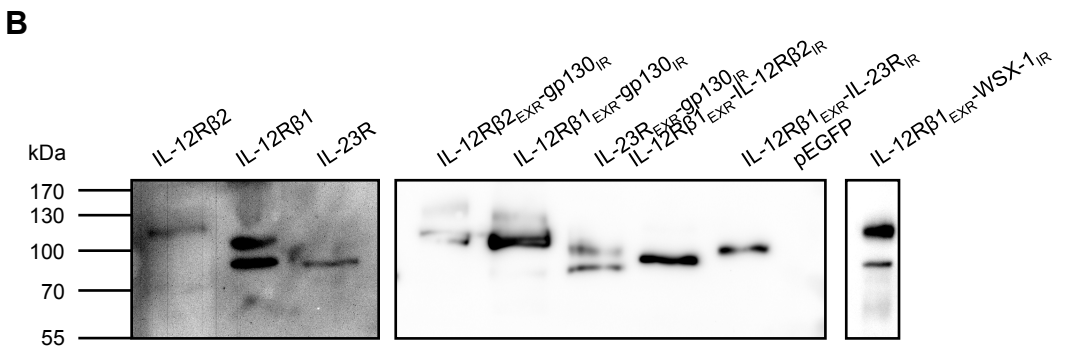

Figure S3

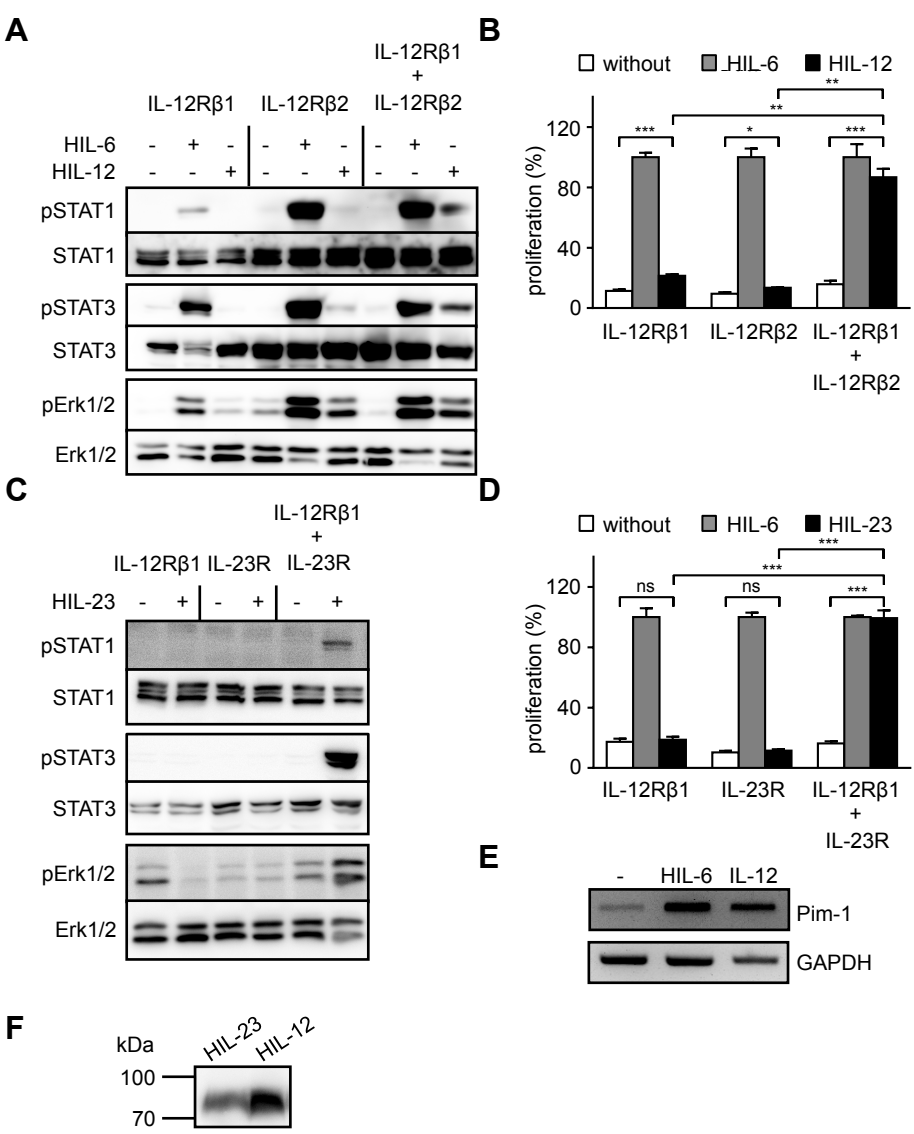

Assembled Western blot data for figures 2M and 6C

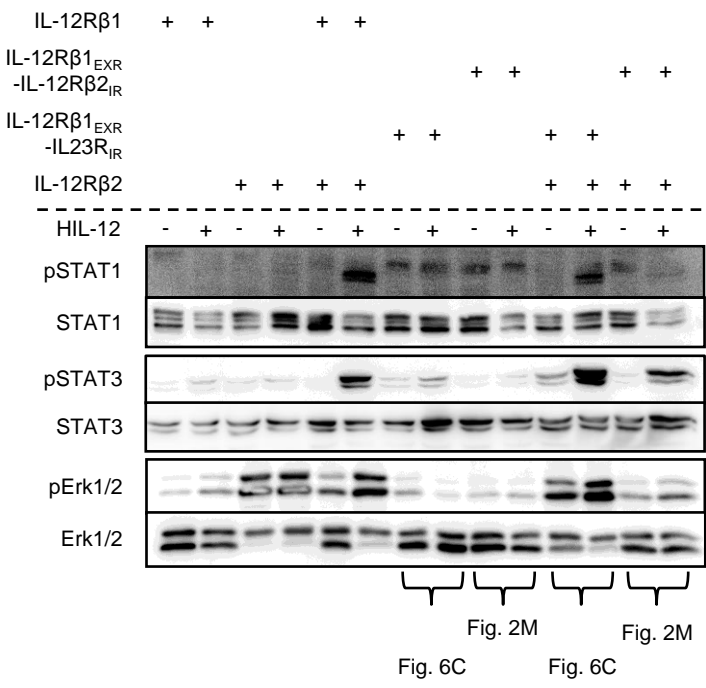

Assembled Western blot data for supplemental figure S2B

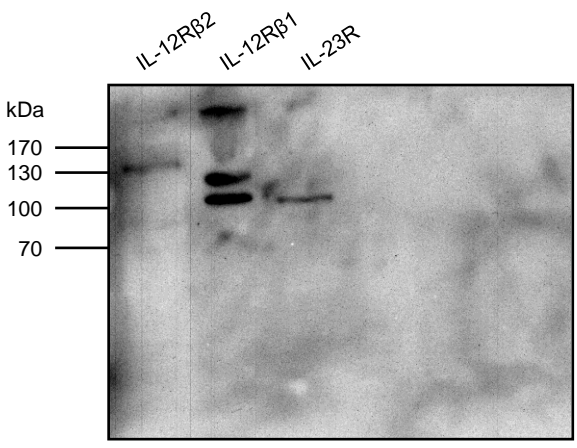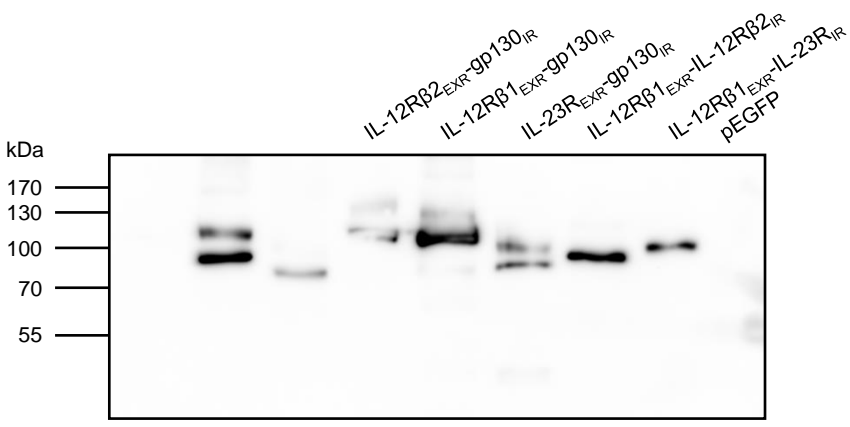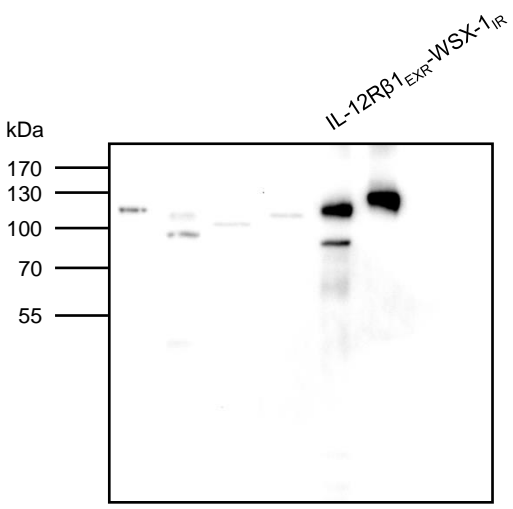

Supplement: 41598_2017_15173_MOESM1_ESM.pdf [file 41598_2017_15173_MOESM1_ESM.pdf]
